# Supplementary material for: Gathering the Evidence on Diet and Depression: A Protocol for an Umbrella Review and Updated Meta-Analyses
Source: MDPI journal article supplement (doi:10.3390/mps6050078), 2023-08-31
Supplement: s1 [file s1]

**Supplementary file 2.** Search strategy for all databases (umbrella review)

**Table S2.1** Full search strategy for Medline (through Ovid; date of last search – 10/06/2020)

| Theme or description    | Search terms                                                                                                                                                                                                                                                                                                                                                                                       |
|-------------------------|----------------------------------------------------------------------------------------------------------------------------------------------------------------------------------------------------------------------------------------------------------------------------------------------------------------------------------------------------------------------------------------------------|
| Diet                    | 1 exp diet/ OR exp nutritive value/ OR exp hunger/ OR appetite regulation/ OR eating/ OR feeding behavior/ OR nutritional physiological phenomena/ OR food/ OR dairy products/ OR dietary carbohydrates/ OR dietary fats/ OR dietary fiber/ OR dietary proteins/ OR dietary supplements/ OR eggs/ OR fast foods/ OR fruit/ OR meals/ OR meat/ OR micronutrients/ OR nuts/ OR seeds/ OR vegetables/ |
|                         | 2 diet*.ti,ab,kw.                                                                                                                                                                                                                                                                                                                                                                                  |
|                         | 3 nutriti*.ti,ab,kw.                                                                                                                                                                                                                                                                                                                                                                               |
|                         | 4 food.ti,ab,kw.                                                                                                                                                                                                                                                                                                                                                                                   |
|                         | 5 eat*.ti,ab,kw.                                                                                                                                                                                                                                                                                                                                                                                   |
|                         | 6 energy intake.ti,ab,kw.                                                                                                                                                                                                                                                                                                                                                                          |
|                         | 7 (macronutrient* or micronutrient* or nutrient*).ti,ab,kw.                                                                                                                                                                                                                                                                                                                                        |
|                         | 8 1 OR 2 OR 3 OR 4 OR 5 OR 6 OR 7                                                                                                                                                                                                                                                                                                                                                                  |
| Depression              | 9 exp depressive disorder/ OR depression/ OR mood disorders/                                                                                                                                                                                                                                                                                                                                       |
|                         | 10 (depression* OR (depressive ADJ3 (condition* OR disorder* OR symptom*))).ti,ab,kw.                                                                                                                                                                                                                                                                                                              |
|                         | 11 9 OR 10                                                                                                                                                                                                                                                                                                                                                                                         |
| Type of study           | 12 systematic review/ OR meta-analysis/                                                                                                                                                                                                                                                                                                                                                            |
|                         | 13 (systematic ADJ3 review).ti,ab,kw                                                                                                                                                                                                                                                                                                                                                               |
|                         | 14 meta-analysis OR (meta ADJ2 analysis).ti,ab,kw                                                                                                                                                                                                                                                                                                                                                  |
|                         | 15 12 OR 13 OR 14                                                                                                                                                                                                                                                                                                                                                                                  |
| Combining search themes | 16 8 AND 11 AND 15                                                                                                                                                                                                                                                                                                                                                                                 |
| Language                | 17 limit 16 to (english or french)                                                                                                                                                                                                                                                                                                                                                                 |
| Search years            | 18 limit 17 to yr="2005 - Current"                                                                                                                                                                                                                                                                                                                                                                 |

**Table S2.2** Full search strategy for EMBASE (through Ovid; date of last search – 10/06/2020)

| Theme or description    | Search terms                                                                                                                                                                                                                  |
|-------------------------|-------------------------------------------------------------------------------------------------------------------------------------------------------------------------------------------------------------------------------|
| Diet                    | 1 exp diet/ OR exp food intake/ OR exp feeding behavior/ OR food/ OR dairy product/ OR dietary fiber/ OR dietary supplement/ OR egg/ OR fast food/ OR fat/ OR fruit/ OR health food/ OR meat/ OR nut/ OR sugar/ OR vegetable/ |
|                         | 2 diet*.ti,ab,kw.                                                                                                                                                                                                             |
|                         | 3 nutriti*.ti,ab,kw.                                                                                                                                                                                                          |
|                         | 4 food.ti,ab,kw.                                                                                                                                                                                                              |
|                         | 5 eat*.ti,ab,kw.                                                                                                                                                                                                              |
|                         | 6 energy intake.ti,ab,kw.                                                                                                                                                                                                     |
|                         | 7 (macronutrient* OR micronutrient* OR nutrient*).ti,ab,kw.                                                                                                                                                                   |
|                         | 8 1 OR 2 OR 3 OR 4 OR 5 OR 6 OR 7                                                                                                                                                                                             |
| Depression              | 9 mood disorder/ OR depression/                                                                                                                                                                                               |
|                         | 10 (depression* OR (depressive adj3 (condition* OR disorder* OR symptom*))).ti,ab,kw.                                                                                                                                         |
|                         | 11 9 OR 10                                                                                                                                                                                                                    |
| Type of study           | 12 systematic review/ OR meta analysis/                                                                                                                                                                                       |
|                         | 13 (systematic adj3 review).ti,ab,kw                                                                                                                                                                                          |
|                         | 14 meta-analysis OR (meta ADJ2 analysis).ti,ab,kw                                                                                                                                                                             |
|                         | 15 12 OR 13 OR 14                                                                                                                                                                                                             |
| Combining search themes | 16 8 AND 11 AND 15                                                                                                                                                                                                            |
| Language                | 17 limit 16 to (english or french)                                                                                                                                                                                            |
| Search years            | 18 limit 17 to yr="2005 - Current"                                                                                                                                                                                            |

**Supplementary file 2.** Search strategy for all databases (umbrella review)

Table S2.3 Full search strategy for PsycINFO (through Ovid; date of last search – 10/06/2020)

| Theme or description    | Search terms                                                                                           |
|-------------------------|--------------------------------------------------------------------------------------------------------|
| Diet                    | 1 exp appetite/ OR diets/ OR food intake/ OR eating behavior/                                          |
|                         | 2 diet*.mp.                                                                                            |
|                         | 3 nutriti*.mp.                                                                                         |
|                         | 4 food.mp.                                                                                             |
|                         | 5 eat*.mp.                                                                                             |
|                         | 6 energy intake.mp.                                                                                    |
|                         | 7 (macronutrient* or micronutrient* or nutrient*).mp.                                                  |
|                         | 8 1 OR 2 OR 3 OR 4 OR 5 OR 6 OR 7                                                                      |
| Depression              | 9 major depression/ OR dysthymic disorder/ OR recurrent depression/ OR treatment resistant depression/ |
|                         | 10 (depression* OR (depressive ADJ3 (condition* OR disorder* OR symptom*))).mp.                        |
|                         | 11 9 OR 10                                                                                             |
| Type of study           | 12 systematic review/ OR meta analysis/                                                                |
|                         | 13 (systematic ADJ3 review).mp.                                                                        |
|                         | 14 meta-analysis OR (meta ADJ2 analysis).mp.                                                           |
|                         | 15 12 OR 13 OR 14                                                                                      |
| Combining search themes | 16 8 AND 11 AND 15                                                                                     |
| Language                | 17 limit 16 to (english or french)                                                                     |
| Search years            | 18 limit 17 to yr="2005 - Current"                                                                     |

Table S2.4 Full search strategy for Cochrane Database of Systematic Reviews and the Joanna Briggs Institute EBP Database (through Ovid; date of last search – 10/06/2020)

| Theme or description    | Search terms                                                                   |
|-------------------------|--------------------------------------------------------------------------------|
| Diet                    | 1 diet*.mp.                                                                    |
|                         | 2 nutriti*.mp                                                                  |
|                         | 3 food.ti,mp.                                                                  |
|                         | 4 eat*.mp.                                                                     |
|                         | 5 energy intake.mp.                                                            |
|                         | 6 (macronutrient* OR micronutrient* OR nutrient*).mp.                          |
|                         | 7 1 OR 2 OR 3 OR 4 OR 5 OR 6                                                   |
| Depression              | 8 (depression* OR (depressive ADJ3 (condition* OR disorder* OR symptom*))).mp. |
| Combining search themes | 9 7 AND 8                                                                      |
| Search years            | 10 limit 9 to yr="2005 - Current"                                              |

Table S2.5 Full search strategy for Web of Science (date of last search – 10/06/2020)

| Theme or description    | Search terms                                                                                              |
|-------------------------|-----------------------------------------------------------------------------------------------------------|
| Diet                    | 1 TS=(diet* OR nutri* OR food OR eat* OR energy intake OR macronutrient* OR *micronutrient* OR nutrient*) |
| Depression              | 2 TS=(depression* OR (depressive NEAR (condition* OR disorder* OR symptom*)))                             |
| Type of study           | 3 TS=(systematic review OR (systematic NEAR review) OR meta-analysis OR (meta NEAR analysis))             |
| Combining search themes | 4 #1 AND #2 AND #3                                                                                        |
| Language                | 5 #4 AND LANGUAGE: (English OR French)                                                                    |
| Search years            | 6 Timespan=2005-2020                                                                                      |
