# Supplementary material for: Gathering the Evidence on Diet and Depression: A Protocol for an Umbrella Review and Updated Meta-Analyses
Source: MDPI journal article supplement (doi:10.3390/mps6050078), 2023-08-31
Supplement: s1 [file s1]

# Supplementary file 1. PRISMA-P 2015 checklist

This checklist has been adapted for use with systematic review protocol submissions to BioMed Central journals from Table 3 in Moher D et al: Preferred reporting items for systematic review and meta-analysis protocols (PRISMA-P) 2015 statement. *Systematic Reviews* 2015 4:1

An Editorial from the Editors-in-Chief of *Systematic Reviews* details why this checklist was adapted - Moher D, Stewart L & Shekelle P: Implementing PRISMA-P: recommendations for prospective authors. *Systematic Reviews* 2016 5:15

| Section/topic                                                                                                            | #  | Checklist item                                                                                                                                                                                                            | Information reported                |                          | Line number(s)             |  |  |  |
|--------------------------------------------------------------------------------------------------------------------------|----|---------------------------------------------------------------------------------------------------------------------------------------------------------------------------------------------------------------------------|-------------------------------------|--------------------------|----------------------------|--|--|--|
|                                                                                                                          |    |                                                                                                                                                                                                                           | Yes                                 | No                       |                            |  |  |  |
| <b>ADMINISTRATIVE INFORMATION</b>                                                                                        |    |                                                                                                                                                                                                                           |                                     |                          |                            |  |  |  |
| <b>Title:</b> Gathering the evidence on diet and depression: a protocol for an umbrella review and updated meta-analyses |    |                                                                                                                                                                                                                           |                                     |                          |                            |  |  |  |
| Identification                                                                                                           | 1a | Identify the report as a protocol of a systematic review                                                                                                                                                                  | <input checked="" type="checkbox"/> | <input type="checkbox"/> | Lines 2 - 3                |  |  |  |
| Update                                                                                                                   | 1b | If the protocol is for an update of a previous systematic review, identify as such                                                                                                                                        | <input checked="" type="checkbox"/> | <input type="checkbox"/> | Lines 2 - 3                |  |  |  |
| Registration                                                                                                             | 2  | If registered, provide the name of the registry (e.g., PROSPERO) and registration number in the Abstract                                                                                                                  | <input checked="" type="checkbox"/> | <input type="checkbox"/> | Line 87<br>Lines 150 - 151 |  |  |  |
| <b>Authors</b>                                                                                                           |    |                                                                                                                                                                                                                           |                                     |                          |                            |  |  |  |
| Contact                                                                                                                  | 3a | Provide name, institutional affiliation, and e-mail address of all protocol authors; provide physical mailing address of corresponding author                                                                             | <input checked="" type="checkbox"/> | <input type="checkbox"/> | Lines 5 - 48               |  |  |  |
| Contributions                                                                                                            | 3b | Describe contributions of protocol authors and identify the guarantor of the review                                                                                                                                       | <input checked="" type="checkbox"/> | <input type="checkbox"/> | Lines 810 - 816            |  |  |  |
| Amendments                                                                                                               | 4  | If the protocol represents an amendment of a previously completed or published protocol, identify as such and list changes; otherwise, state plan for documenting important protocol amendments                           | <input checked="" type="checkbox"/> | <input type="checkbox"/> | Lines 158 - 159            |  |  |  |
| <b>Support</b>                                                                                                           |    |                                                                                                                                                                                                                           |                                     |                          |                            |  |  |  |
| Sources                                                                                                                  | 5a | Indicate sources of financial or other support for the review                                                                                                                                                             | <input checked="" type="checkbox"/> | <input type="checkbox"/> | Lines 802 - 808            |  |  |  |
| Sponsor                                                                                                                  | 5b | Provide name for the review funder and/or sponsor                                                                                                                                                                         | <input checked="" type="checkbox"/> | <input type="checkbox"/> | Lines 803 - 804            |  |  |  |
| Role of sponsor/funder                                                                                                   | 5c | Describe roles of funder(s), sponsor(s), and/or institution(s), if any, in developing the protocol                                                                                                                        | <input checked="" type="checkbox"/> | <input type="checkbox"/> | Line 804                   |  |  |  |
| <b>INTRODUCTION</b>                                                                                                      |    |                                                                                                                                                                                                                           |                                     |                          |                            |  |  |  |
| Rationale                                                                                                                | 6  | Describe the rationale for the review in the context of what is already known                                                                                                                                             | <input checked="" type="checkbox"/> | <input type="checkbox"/> | Lines 95 - 135             |  |  |  |
| Objectives                                                                                                               | 7  | Provide an explicit statement of the question(s) the review will address with reference to participants, interventions, comparators, and outcomes (PICO)                                                                  | <input checked="" type="checkbox"/> | <input type="checkbox"/> | Lines 136 - 147            |  |  |  |
| <b>METHODS</b>                                                                                                           |    |                                                                                                                                                                                                                           |                                     |                          |                            |  |  |  |
| Eligibility criteria                                                                                                     | 8  | Specify the study characteristics (e.g., PICO, study design, setting, time frame) and report characteristics (e.g., years considered, language, publication status) to be used as criteria for eligibility for the review | <input checked="" type="checkbox"/> | <input type="checkbox"/> | Lines 189 - 245            |  |  |  |

## Supplementary file 1. PRISMA-P 2015 checklist

| Section/topic                      | #   | Checklist item                                                                                                                                                                                                                              | Information reported                |                          | Line number(s)                   |
|------------------------------------|-----|---------------------------------------------------------------------------------------------------------------------------------------------------------------------------------------------------------------------------------------------|-------------------------------------|--------------------------|----------------------------------|
|                                    |     |                                                                                                                                                                                                                                             | Yes                                 | No                       |                                  |
| Information sources                | 9   | Describe all intended information sources (e.g., electronic databases, contact with study authors, trial registers, or other grey literature sources) with planned dates of coverage                                                        | <input checked="" type="checkbox"/> | <input type="checkbox"/> | Lines 165 - 187                  |
| Search strategy                    | 10  | Present draft of search strategy to be used for at least one electronic database, including planned limits, such that it could be repeated                                                                                                  | <input checked="" type="checkbox"/> | <input type="checkbox"/> | Table 1 - 2<br>Supp. files 2 – 3 |
| <b>STUDY RECORDS</b>               |     |                                                                                                                                                                                                                                             |                                     |                          |                                  |
| Data management                    | 11a | Describe the mechanism(s) that will be used to manage records and data throughout the review                                                                                                                                                | <input checked="" type="checkbox"/> | <input type="checkbox"/> | Lines 249 - 274                  |
| Selection process                  | 11b | State the process that will be used for selecting studies (e.g., two independent reviewers) through each phase of the review (i.e., screening, eligibility, and inclusion in meta-analysis)                                                 | <input checked="" type="checkbox"/> | <input type="checkbox"/> | Lines 249 - 258                  |
| Data collection process            | 11c | Describe planned method of extracting data from reports (e.g., piloting forms, done independently, in duplicate), any processes for obtaining and confirming data from investigators                                                        | <input checked="" type="checkbox"/> | <input type="checkbox"/> | Lines 260 – 274                  |
| Data items                         | 12  | List and define all variables for which data will be sought (e.g., PICO items, funding sources), any pre-planned data assumptions and simplifications                                                                                       | <input checked="" type="checkbox"/> | <input type="checkbox"/> | Table 3 - 4                      |
| Outcomes and prioritization        | 13  | List and define all outcomes for which data will be sought, including prioritization of main and additional outcomes, with rationale                                                                                                        | <input checked="" type="checkbox"/> | <input type="checkbox"/> | Table 3 - 4                      |
| Risk of bias in individual studies | 14  | Describe anticipated methods for assessing risk of bias of individual studies, including whether this will be done at the outcome or study level, or both; state how this information will be used in data synthesis                        | <input checked="" type="checkbox"/> | <input type="checkbox"/> | Line 276 – 332                   |
| <b>DATA</b>                        |     |                                                                                                                                                                                                                                             |                                     |                          |                                  |
| Synthesis                          | 15a | Describe criteria under which study data will be quantitatively synthesized                                                                                                                                                                 | <input checked="" type="checkbox"/> | <input type="checkbox"/> | Line 334 - 409                   |
|                                    | 15b | If data are appropriate for quantitative synthesis, describe planned summary measures, methods of handling data, and methods of combining data from studies, including any planned exploration of consistency (e.g., $I^2$ , Kendall's tau) | <input checked="" type="checkbox"/> | <input type="checkbox"/> | Line 364 - 404                   |
|                                    | 15c | Describe any proposed additional analyses (e.g., sensitivity or subgroup analyses, meta-regression)                                                                                                                                         | <input checked="" type="checkbox"/> | <input type="checkbox"/> | Line 382 - 390                   |
|                                    | 15d | If quantitative synthesis is not appropriate, describe the type of summary planned                                                                                                                                                          | <input checked="" type="checkbox"/> | <input type="checkbox"/> | Line 356 - 362                   |
| Meta-bias(es)                      | 16  | Specify any planned assessment of meta-bias(es) (e.g., publication bias across studies, selective reporting within studies)                                                                                                                 | <input checked="" type="checkbox"/> | <input type="checkbox"/> | Line 406 - 409                   |
| Confidence in cumulative evidence  | 17  | Describe how the strength of the body of evidence will be assessed (e.g., GRADE)                                                                                                                                                            | <input checked="" type="checkbox"/> | <input type="checkbox"/> | Line 411 - 429                   |
