# Supplementary material for: Gathering the Evidence on Diet and Depression: A Protocol for an Umbrella Review and Updated Meta-Analyses
Source: MDPI journal article supplement (doi:10.3390/mps6050078), 2023-08-31
Supplement: s1 [file s1]

**Supplementary file 3.** Search strategy for all databases (updated meta-analyses)

**Table S3.1** Full search strategy for Medline (through Ovid)

| Theme or description    | Search terms                                                                         |
|-------------------------|--------------------------------------------------------------------------------------|
| Dietary pattern         | 1 exp diet/                                                                          |
|                         | 2 (diet OR diet* pattern* OR diet* quality).ti,ab,kw.                                |
|                         | 3 eating pattern*.ti,ab,kw.                                                          |
|                         | 4 food pattern*.ti,ab,kw.                                                            |
|                         | 5 1 OR 2 OR 3 OR 4                                                                   |
| Depression              | 6 exp depressive disorder/ OR depression/ OR mood disorders/                         |
|                         | 7 (depression* OR (depressive ADJ3 (condition* OR disorder* OR symptom*))).ti,ab,kw. |
|                         | 8 6 OR 7                                                                             |
| Combining search themes | 9 5 AND 8                                                                            |
| Language                | 10 limit 9 to (english or french)                                                    |
| Search years            | 11 limit 10 to yr="2 years prior last SR publication - date of search"               |

**Table S3.2** Full search strategy for EMBASE (through Ovid)

| Theme or description    | Search terms                                                                         |
|-------------------------|--------------------------------------------------------------------------------------|
| Dietary pattern         | 1 exp diet/                                                                          |
|                         | 2 (diet OR diet* pattern* OR diet* quality).ti,ab,kw.                                |
|                         | 3 eating pattern*.ti,ab,kw.                                                          |
|                         | 4 food pattern*.ti,ab,kw.                                                            |
|                         | 5 1 OR 2 OR 3 OR 4                                                                   |
| Depression              | 6 mood disorder/ OR depression/                                                      |
|                         | 7 (depression* OR (depressive ADJ3 (condition* OR disorder* OR symptom*))).ti,ab,kw. |
|                         | 8 6 OR 7                                                                             |
| Combining search themes | 9 5 AND 8                                                                            |
| Language                | 10 limit 9 to (english or french)                                                    |
| Search years            | 11 limit 10 to yr="2 years prior last SR publication - date of search"               |

**Table S3.3** Full search strategy for PsycINFO (through Ovid)

| Theme or description    | Search terms                                                                                           |
|-------------------------|--------------------------------------------------------------------------------------------------------|
| Dietary pattern         | 1 diets/                                                                                               |
|                         | 2 (diet OR diet* pattern* OR diet* quality).mp.                                                        |
|                         | 3 eating pattern*.mp.                                                                                  |
|                         | 4 food pattern*.mp.                                                                                    |
|                         | 5 1 OR 2 OR 3 OR 4                                                                                     |
| Depression              | 6 major depression/ OR dysthymic disorder/ OR recurrent depression/ OR treatment resistant depression/ |
|                         | 7 (depression* OR (depressive ADJ3 (condition* OR disorder* OR symptom*))).mp.                         |
|                         | 8 8 OR 9                                                                                               |
| Combining search themes | 9 5 AND 8                                                                                              |
| Language                | 10 limit 9 to (english or french)                                                                      |
| Search years            | 11 limit 10 to yr="2 years prior last SR publication - date of search"                                 |

**Table S3.4** Full search strategy for the Cochrane Central Register of Controlled Trials

| Theme or description    | Search terms                                                                   |
|-------------------------|--------------------------------------------------------------------------------|
| Dietary pattern         | 1 (diet OR diet* pattern* OR diet* quality).mp.                                |
|                         | 2 eating pattern*.mp.                                                          |
|                         | 3 food pattern*.mp                                                             |
|                         | 4 1 OR 2 OR 3                                                                  |
| Depression              | 5 (depression* OR (depressive ADJ3 (condition* OR disorder* OR symptom*))).mp. |
| Combining search themes | 6 4 AND 5                                                                      |
| Search years            | 7 limit 6 to yr="2 years prior last SR publication - date of search"           |

**Supplementary file 3.** Search strategy for all databases (updated meta-analyses)

Table S3.5 Full search strategy for Web of Science

| Theme or description    | Search terms |                                                                                  |
|-------------------------|--------------|----------------------------------------------------------------------------------|
| Dietary pattern         | 1            | TS=(diet OR diet* pattern* OR diet* quality OR eating pattern* OR food pattern*) |
| Depression              | 2            | TS=(depression* OR (depressive ADJ3 (condition* OR disorder* OR symptom*)))      |
| Combining search themes | 3            | #1 AND #2                                                                        |
| Language                | 4            | #3 AND LANGUAGE: (English OR French)                                             |
| Search years            | 5            | Timespan=2 years prior last SR publication - date of search                      |
